# Supplementary material for: Baseline data of parasite clearance in patients with falciparum malaria treated with an artemisinin derivative: an individual patient data meta-analysis
Source: PubMed Central journal article supplement (PMC4578675; doi:10.1186/s12936-015-0874-1), 2015-09-22

Additional file 3

Distribution of  $PC_{1/2}$  by study location and year

**Figure S1 Distribution of  $PC_{1/2}$  in Cambodia in patients treated with artesunate alone in the first 72 hours or artesunate and mefloquine**

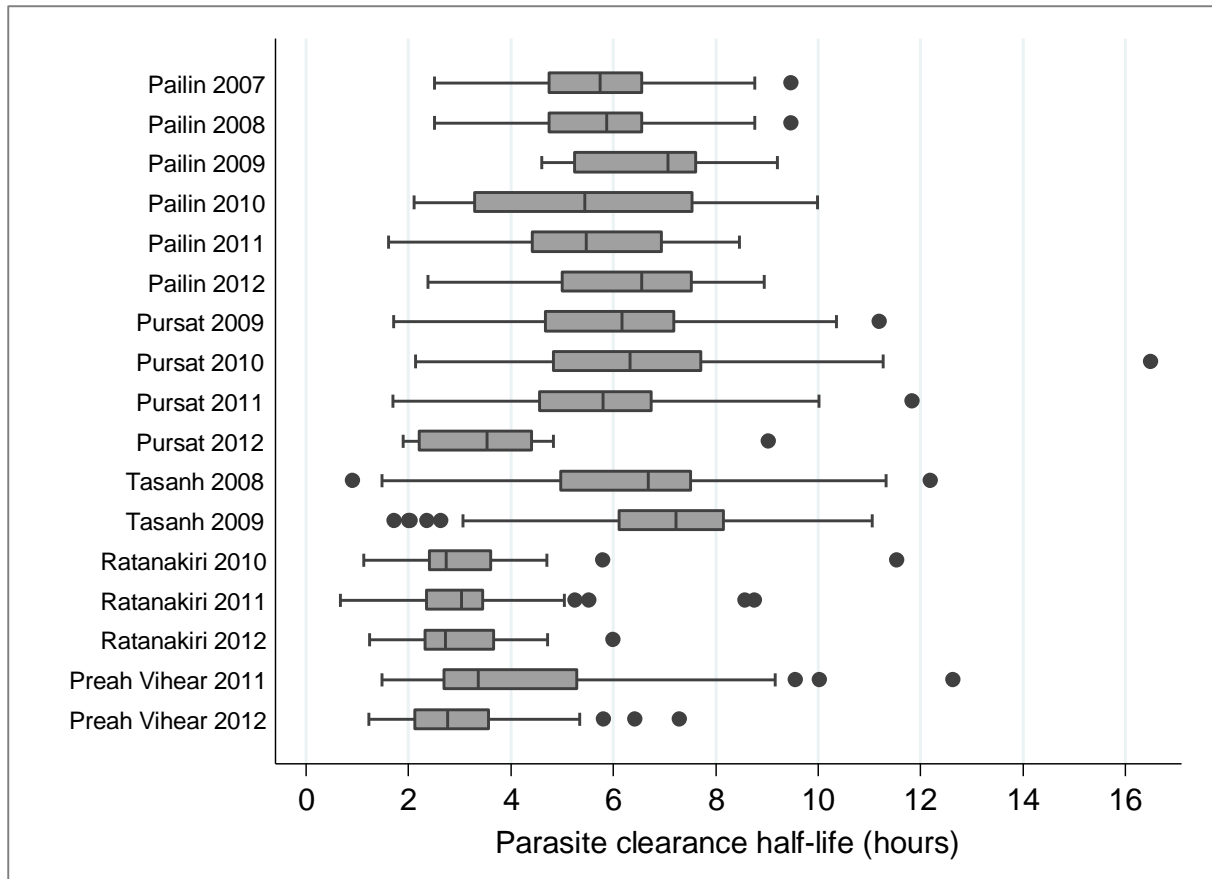

**Figure S2. Distribution of  $PC_{1/2}$  in western Thailand in patients treated with artesunate alone in the first 48 hours or in combination with mefloquine**

Light grey bars represent data from the study in hyperparasitaemic patients, dark grey bars represent data from studies in uncomplicated malaria.

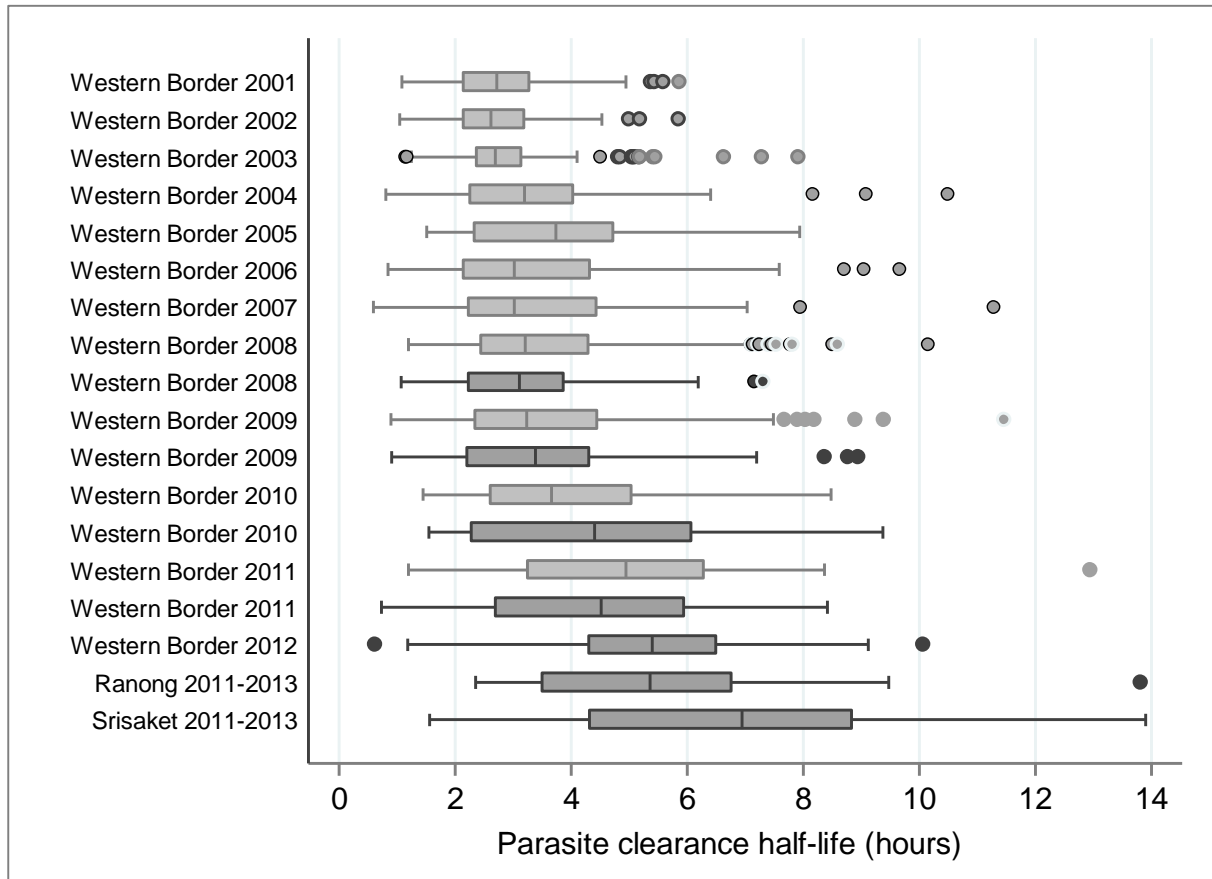

**Figure S3. Distribution of  $PC_{1/2}$  in patients treated with a standard artemether-lumefantrine regimen**

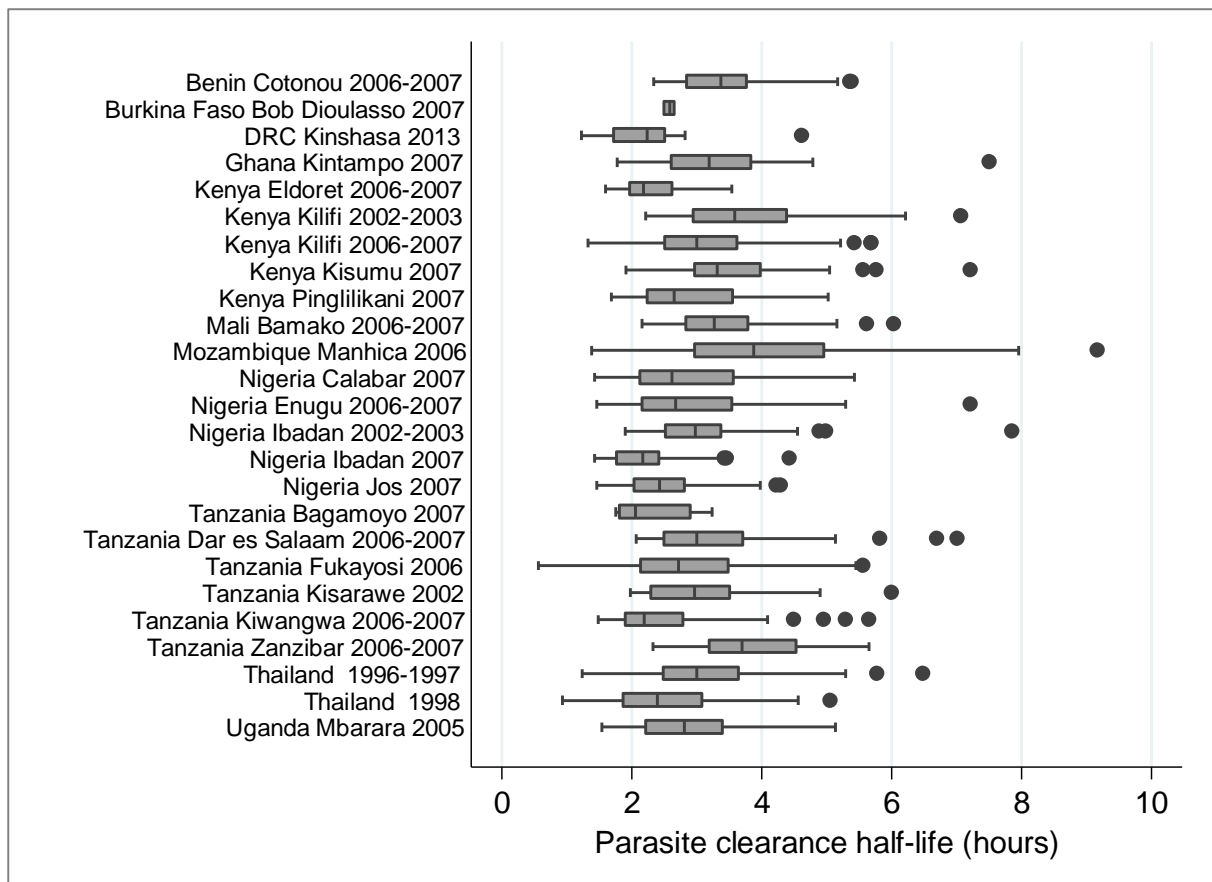

**Figure S4. Distribution of  $PC_{1/2}$  in patients treated with 2 mg/kg/day artesunate alone or in combination with other drugs (in all areas except Thailand and Cambodia)**

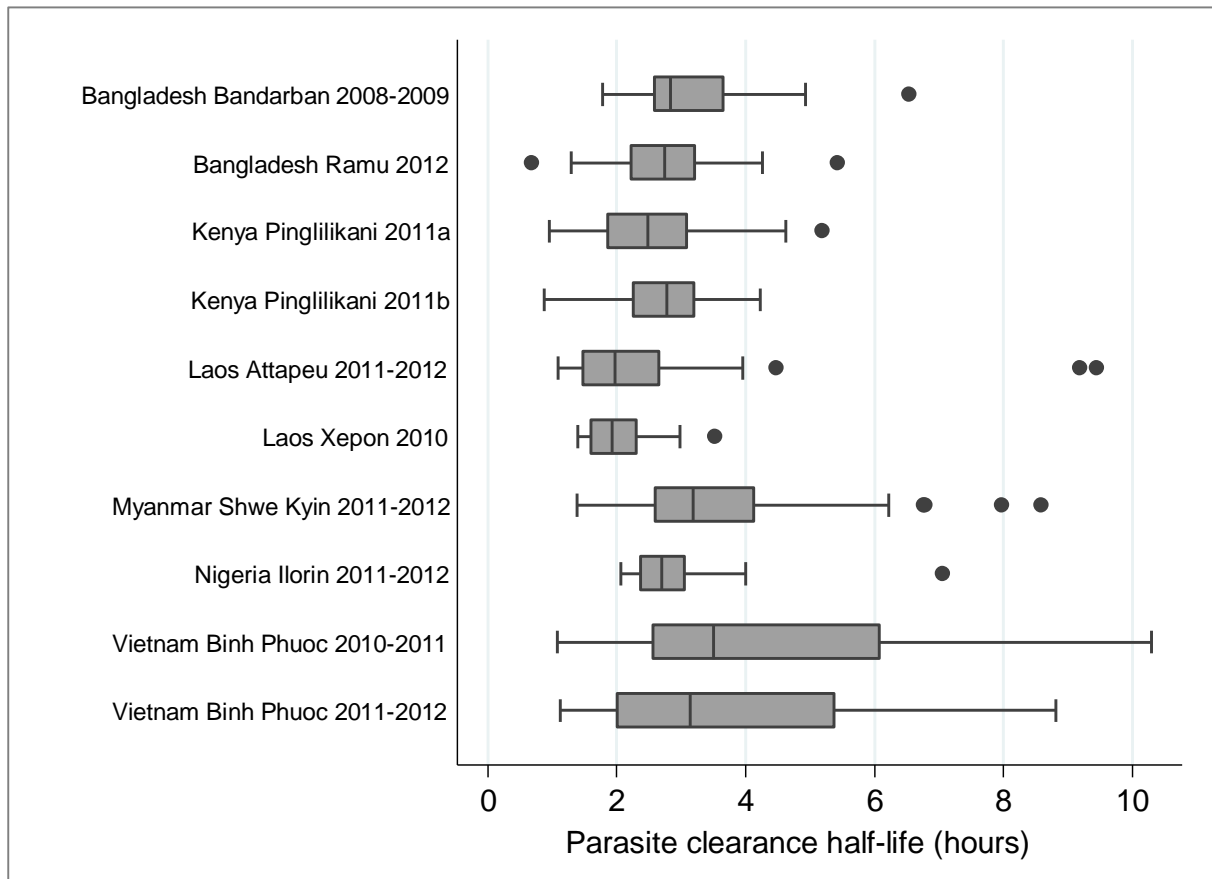

**Figure S5. Distribution of PC<sub>1/2</sub> in patients treated with 4 mg/kg/day artesunate alone or in combination with other drugs (in all areas except Thailand and Cambodia)**

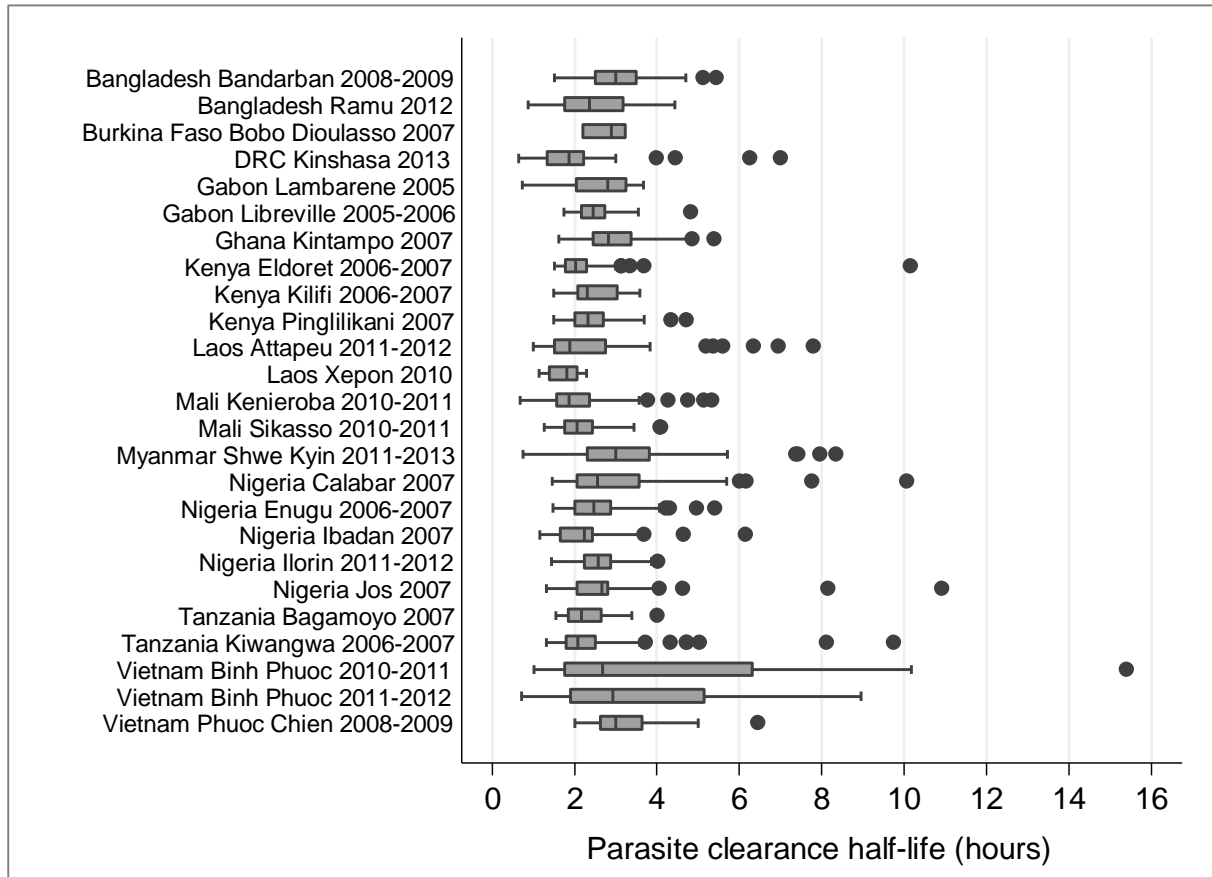

Supplement: 12936_2015_874_MOESM3_ESM.pdf [file 12936_2015_874_MOESM3_ESM.pdf]
